# Supplementary material for: Encapsulated Bdellovibrio Powder as a Potential Bio-Disinfectant against Whiteleg Shrimp-Pathogenic Vibrios
Source: MDPI journal article supplement (doi:10.3390/microorganisms7080244), 2019-08-07
Supplement: s1 [file s1]

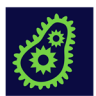

## Supplementary Materials

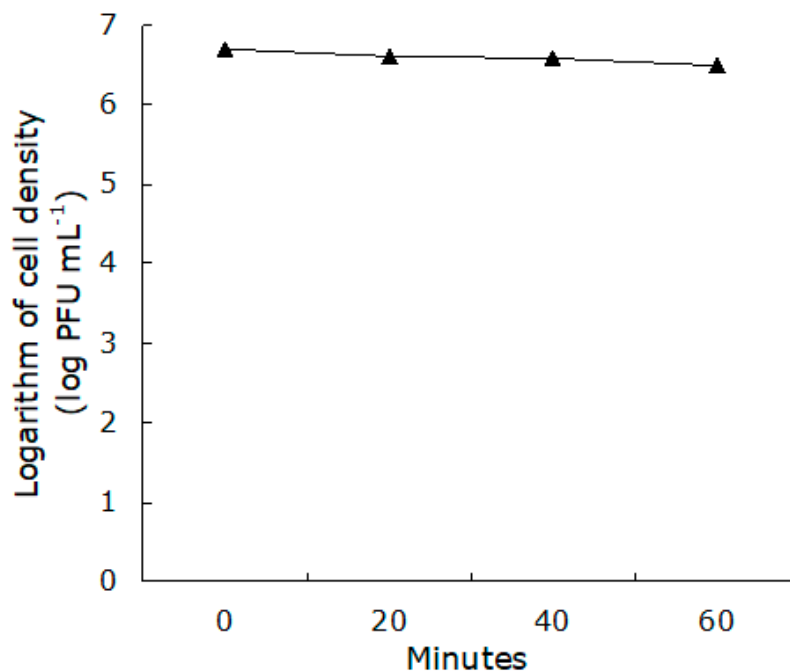

Figure S1. Survival of *Bdellovibrio* sp. strain F16 in a water bath at 50 °C.

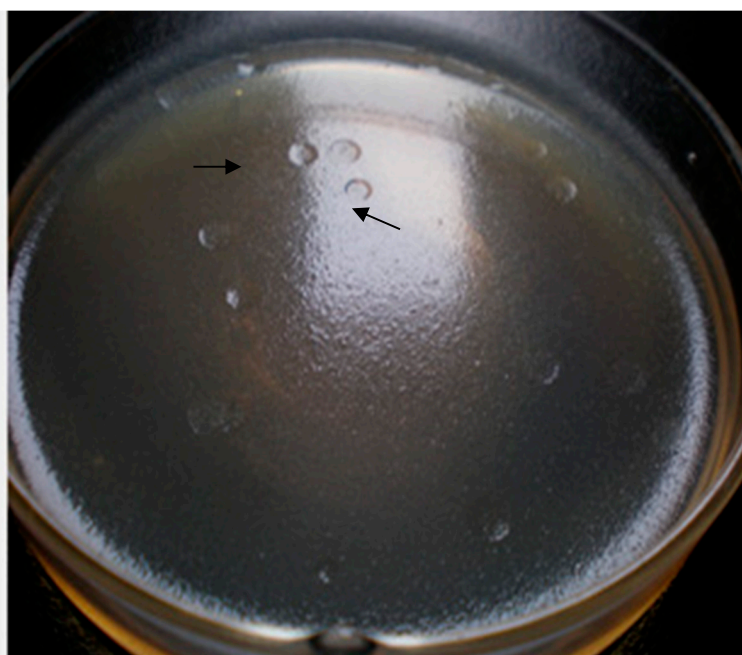

Figure S2. Plaques of *Bdellovibrio* sp. strain F16. Arrows show the round plaques formed on the double-layer agar plate after incubation for 48 h.
